# Supplementary material
Source: PubMed Central journal article supplement (PMC4747255)
Supplement: NIHMS718938-supplement-Tables.pdf [file NIHMS718938-supplement-Tables.pdf]

# Supplementary Material for “A dose-schedule-finding design for phase I/II clinical trials”

Beibei Guo<sup>1</sup>, Yisheng Li<sup>2,\*</sup>, and Ying Yuan<sup>2</sup>

<sup>1</sup>Department of Experimental Statistics, Louisiana State University

Baton Rouge, LA 70803, USA

<sup>2</sup>Department of Biostatistics, The University of Texas MD Anderson Cancer Center

Houston, TX 77030, USA

\**email*: [ysli@mdanderson.org](mailto:ysli@mdanderson.org)

Table 1: A demonstration of violation of model (2) for scenarios 9-11 used in the simulation study

| Dose        | $\alpha_{jk}$ |       |       | $\beta_{jk}$ |       |       | $\beta_{jk} - \alpha_{jk}$ |      |      |
|-------------|---------------|-------|-------|--------------|-------|-------|----------------------------|------|------|
|             | Schedule      |       |       | Schedule     |       |       | Schedule                   |      |      |
|             | 1             | 2     | 3     | 1            | 2     | 3     | 1                          | 2    | 3    |
| Scenario 9  |               |       |       |              |       |       |                            |      |      |
| 1           | -2.30         | -1.80 | -2.50 | -0.40        | -0.60 | -1.20 | 1.90                       | 1.20 | 1.30 |
| 2           | -1.90         | -1.70 | -2.30 | -0.30        | -0.40 | -0.70 | 1.60                       | 1.30 | 1.60 |
| 3           | -0.20         | -1.10 | -2.20 | 0.90         | 0.50  | -0.40 | 1.10                       | 1.60 | 1.80 |
| 4           | 0.20          | 0.10  | -2.00 | 1.30         | 1.60  | -0.30 | 1.10                       | 1.50 | 1.70 |
| Scenario 10 |               |       |       |              |       |       |                            |      |      |
| 1           | -2.20         | -1.60 | -2.00 | -1.00        | -0.20 | -0.30 | 1.20                       | 1.40 | 1.70 |
| 2           | -0.40         | -0.20 | -1.40 | 0.90         | 1.40  | 0.45  | 1.30                       | 1.60 | 1.85 |
| 3           | -0.30         | -0.10 | -0.50 | 1.10         | 1.60  | 0.70  | 1.40                       | 1.70 | 1.20 |
| 4           | -0.20         | 0.20  | -0.40 | 1.30         | 1.70  | 0.70  | 1.50                       | 1.50 | 1.10 |
| Scenario 11 |               |       |       |              |       |       |                            |      |      |
| 1           | -0.20         | -2.00 | -2.10 | 0.90         | -0.70 | -0.50 | 1.10                       | 1.30 | 1.60 |
| 2           | -0.10         | -1.90 | -1.10 | 1.10         | -0.50 | 0.36  | 1.20                       | 1.40 | 1.46 |
| 3           | 0.00          | -1.00 | 0.10  | 1.30         | 0.42  | 1.50  | 1.30                       | 1.42 | 1.40 |
| 4           | 0.20          | -0.10 | 0.30  | 1.60         | 1.40  | 1.80  | 1.40                       | 1.50 | 1.50 |

Note: In order for a scenario to satisfy model (2) in the paper,  $\beta_{jk} - \alpha_{jk}$  must be a constant across all  $(j, k)$ .

Table 2: Selection probability and number of patients treated at each dose-schedule combination assuming  $\delta \sim U(0, 6)$  and  $\gamma \sim U(0, 6)$

| Dose | Selection percentage |             |             | Number of patients |             |            | Selection percentage |             |             | Number of patients |            |             |
|------|----------------------|-------------|-------------|--------------------|-------------|------------|----------------------|-------------|-------------|--------------------|------------|-------------|
|      | Schedule             |             |             | Schedule           |             |            | Schedule             |             |             | Schedule           |            |             |
|      | 1                    | 2           | 3           | 1                  | 2           | 3          | 1                    | 2           | 3           | 1                  | 2          | 3           |
|      | Scenario 1           |             |             |                    |             |            | Scenario 2           |             |             |                    |            |             |
| 1    | 0.3                  | 0.3         | 0.8         | 2.1                | 2.0         | 2.2        | 4.6                  | 2.9         | 5.3         | 2.6                | 2.5        | 2.7         |
| 2    | 3.6                  | 2.6         | 17.5        | 2.8                | 2.4         | 4.9        | 11.4                 | <b>48.8</b> | 18.4        | 5.4                | <b>8.8</b> | 5.7         |
| 3    | <b>48.7</b>          | 5.2         | 4.1         | <b>8.4</b>         | 2.9         | 4.3        | 0.7                  | 5.4         | 1.9         | 2.3                | 4.1        | 2.6         |
| 4    | 3.7                  | 9.5         | 1.2         | 2.8                | 3.1         | 1.7        | 0.1                  | 0.2         | 0.0         | 0.8                | 1.4        | 1.0         |
|      | Scenario 3           |             |             |                    |             |            | Scenario 4           |             |             |                    |            |             |
| 1    | <b>38.6</b>          | 7.8         | 0.4         | <b>6.5</b>         | 3.3         | 2.0        | 0.4                  | 0.8         | 3.0         | 2.1                | 2.2        | 2.5         |
| 2    | 19.7                 | 8.5         | 15.0        | 6.4                | 4.9         | 4.7        | 0.0                  | 1.0         | 3.6         | 2.1                | 2.2        | 2.8         |
| 3    | 0.4                  | 0.2         | 8.2         | 1.9                | 1.9         | 5.2        | 0.6                  | 2.5         | 13.2        | 2.2                | 2.5        | 4.4         |
| 4    | 0.0                  | 0.0         | 0.1         | 0.7                | 0.6         | 1.7        | 1.9                  | 10.7        | <b>62.1</b> | 2.5                | 3.8        | <b>10.7</b> |
|      | Scenario 5           |             |             |                    |             |            | Scenario 6           |             |             |                    |            |             |
| 1    | 0.0                  | 0.2         | 0.1         | 2.0                | 2.0         | 2.0        | 0.0                  | 0.6         | 2.1         | 2.0                | 2.1        | 2.9         |
| 2    | 0.7                  | 1.7         | 2.5         | 2.1                | 2.4         | 2.6        | 1.7                  | <b>42.2</b> | 1.0         | 2.5                | <b>8.8</b> | 2.2         |
| 3    | 2.0                  | 16.1        | <b>43.1</b> | 2.6                | 4.8         | <b>7.7</b> | <b>41.2</b>          | 6.4         | 0.5         | <b>8.4</b>         | 5.1        | 0.9         |
| 4    | <b>15.7</b>          | 8.6         | 8.3         | <b>3.8</b>         | 4.0         | 3.8        | 3.9                  | 0.1         | 0.2         | 3.0                | 1.6        | 0.3         |
|      | Scenario 7           |             |             |                    |             |            | Scenario 8           |             |             |                    |            |             |
| 1    | 2.0                  | 5.7         | <b>18.0</b> | 2.2                | 2.9         | <b>4.3</b> | 0.0                  | 0.1         | 0.0         | 2.0                | 2.0        | 2.0         |
| 2    | <b>29.1</b>          | 13.9        | 10.6        | <b>6.1</b>         | 5.4         | 4.6        | 0.7                  | <b>28.6</b> | 1.2         | 2.2                | <b>6.2</b> | 2.3         |
| 3    | 10.8                 | 3.7         | 2.2         | 5.2                | 3.1         | 2.4        | <b>28.3</b>          | 7.0         | <b>28.7</b> | <b>6.1</b>         | 4.5        | <b>6.0</b>  |
| 4    | 1.9                  | 0.2         | 0.1         | 1.7                | 1.0         | 0.8        | 3.0                  | 0.5         | 1.9         | 2.5                | 1.7        | 2.4         |
|      | Scenario 9           |             |             |                    |             |            | Scenario 10          |             |             |                    |            |             |
| 1    | 0.2                  | 0.1         | 0.0         | 2.0                | 2.0         | 2.0        | 0.7                  | 7.7         | 1.3         | 2.2                | 3.2        | 2.3         |
| 2    | 14.0                 | 5.6         | 0.0         | 4.3                | 2.9         | 2.0        | 14.7                 | 6.5         | <b>35.4</b> | 5.2                | 4.4        | <b>6.7</b>  |
| 3    | 7.8                  | <b>60.3</b> | 0.6         | 5.0                | <b>10.0</b> | 2.1        | 5.4                  | 1.3         | 19.3        | 3.7                | 2.0        | 5.7         |
| 4    | 0.2                  | 3.7         | 5.7         | 2.0                | 2.8         | 2.7        | 0.9                  | 0.1         | 5.2         | 1.3                | 0.8        | 2.2         |
|      | Scenario 11          |             |             |                    |             |            | Scenario 12          |             |             |                    |            |             |
| 1    | 4.7                  | 0.2         | 2.2         | 3.4                | 2.0         | 2.3        | 0.6                  | 2.1         | 1.0         | 2.2                | 2.4        | 2.3         |
| 2    | 2.0                  | 3.8         | <b>40.9</b> | 2.9                | 2.6         | <b>9.0</b> | 1.3                  | 1.9         | 1.8         | 2.3                | 2.4        | 2.5         |
| 3    | 0.3                  | <b>40.6</b> | 0.9         | 1.2                | <b>8.7</b>  | 3.2        | 1.7                  | 4.5         | 4.6         | 2.3                | 2.8        | 2.9         |
| 4    | 0.0                  | 1.9         | 0.1         | 0.5                | 2.7         | 1.2        | 5.1                  | 17.2        | <b>57.0</b> | 3.2                | 4.8        | <b>9.8</b>  |

Table 3: Selection probability and number of patients treated at each dose-schedule combination assuming  $\delta \sim U(0, 8)$  and  $\gamma \sim U(0, 6)$

| Dose | Selection percentage |             |             | Number of patients |            |            | Selection percentage |             |             | Number of patients |            |             |
|------|----------------------|-------------|-------------|--------------------|------------|------------|----------------------|-------------|-------------|--------------------|------------|-------------|
|      | Schedule             |             |             | Schedule           |            |            | Schedule             |             |             | Schedule           |            |             |
|      | 1                    | 2           | 3           | 1                  | 2          | 3          | 1                    | 2           | 3           | 1                  | 2          | 3           |
|      | Scenario 1           |             |             |                    |            |            | Scenario 2           |             |             |                    |            |             |
| 1    | 0.2                  | 0.0         | 0.7         | 2.0                | 2.0        | 2.1        | 3.9                  | 2.6         | 4.3         | 2.6                | 2.3        | 2.7         |
| 2    | 3.5                  | 1.3         | 19.6        | 2.7                | 2.2        | 5.1        | 14.2                 | <b>51.4</b> | 14.2        | 5.7                | <b>9.0</b> | 5.4         |
| 3    | <b>49.8</b>          | 4.6         | 4.7         | <b>8.5</b>         | 2.9        | 4.4        | 1.5                  | 5.6         | 1.5         | 2.3                | 4.1        | 2.5         |
| 4    | 4.4                  | 8.7         | 0.7         | 3.0                | 3.1        | 1.7        | 0.1                  | 0.2         | 0.1         | 0.9                | 1.4        | 1.0         |
|      | Scenario 3           |             |             |                    |            |            | Scenario 4           |             |             |                    |            |             |
| 1    | <b>36.1</b>          | 8.8         | 0.6         | <b>6.2</b>         | 3.1        | 2.1        | 0.1                  | 0.2         | 2.9         | 2.1                | 2.1        | 2.6         |
| 2    | 19.4                 | 9.8         | 14.9        | 6.5                | 5.2        | 4.7        | 0.7                  | 1.6         | 4.1         | 2.1                | 2.3        | 2.8         |
| 3    | 0.5                  | 0.6         | 8.4         | 1.9                | 2.1        | 5.2        | 0.8                  | 2.1         | 13.5        | 2.1                | 2.4        | 4.4         |
| 4    | 0.0                  | 0.0         | 0.2         | 0.6                | 0.6        | 1.7        | 2.4                  | 9.3         | <b>62.1</b> | 2.5                | 3.9        | <b>10.6</b> |
|      | Scenario 5           |             |             |                    |            |            | Scenario 6           |             |             |                    |            |             |
| 1    | 0.2                  | 0.2         | 0.2         | 2.0                | 2.0        | 2.0        | 0.1                  | 1.0         | 3.2         | 2.0                | 2.1        | 2.9         |
| 2    | 0.6                  | 3.1         | 1.9         | 2.1                | 2.6        | 2.5        | 1.7                  | <b>42.0</b> | 1.1         | 2.4                | <b>8.9</b> | 2.3         |
| 3    | 2.8                  | 17.8        | <b>41.7</b> | 2.6                | 4.9        | <b>7.6</b> | <b>39.4</b>          | 6.1         | 0.3         | <b>8.3</b>         | 5.1        | 1.0         |
| 4    | <b>16.2</b>          | 7.3         | 7.2         | <b>3.9</b>         | 3.8        | 3.7        | 4.5                  | 0.6         | 0.0         | 2.9                | 1.7        | 0.4         |
|      | Scenario 7           |             |             |                    |            |            | Scenario 8           |             |             |                    |            |             |
| 1    | 0.9                  | 6.4         | <b>20.0</b> | 2.3                | 3.0        | <b>4.3</b> | 0.0                  | 0.4         | 0.1         | 2.0                | 2.1        | 2.0         |
| 2    | <b>28.2</b>          | 12.3        | 7.9         | <b>6.1</b>         | 5.2        | 4.7        | 0.7                  | <b>26.8</b> | 0.7         | 2.3                | <b>5.8</b> | 2.3         |
| 3    | 13.2                 | 3.9         | 3.4         | 5.3                | 2.9        | 2.4        | <b>28.4</b>          | 6.6         | <b>30.0</b> | <b>5.9</b>         | 4.7        | <b>6.1</b>  |
| 4    | 2.2                  | 0.2         | 0.1         | 1.8                | 1.1        | 0.8        | 2.4                  | 0.4         | 3.2         | 2.5                | 1.7        | 2.6         |
|      | Scenario 9           |             |             |                    |            |            | Scenario 10          |             |             |                    |            |             |
| 1    | 0.6                  | 0.5         | 0.0         | 2.1                | 2.1        | 2.0        | 1.2                  | 9.1         | 1.7         | 2.2                | 3.3        | 2.2         |
| 2    | 13.9                 | 6.4         | 0.1         | 4.6                | 3.0        | 2.0        | 13.6                 | 7.1         | <b>31.7</b> | 5.1                | 4.6        | <b>6.2</b>  |
| 3    | 8.5                  | <b>57.5</b> | 0.9         | 5.0                | <b>9.4</b> | 2.1        | 7.2                  | 0.4         | 21.7        | 3.9                | 2.0        | 6.0         |
| 4    | 0.8                  | 3.5         | 5.4         | 1.9                | 2.9        | 2.7        | 0.9                  | 0.1         | 4.7         | 1.3                | 0.8        | 2.3         |
|      | Scenario 11          |             |             |                    |            |            | Scenario 12          |             |             |                    |            |             |
| 1    | 5.0                  | 0.2         | 1.7         | 3.5                | 2.0        | 2.4        | 0.8                  | 1.8         | 1.8         | 2.2                | 2.4        | 2.4         |
| 2    | 2.8                  | 3.8         | <b>42.7</b> | 2.9                | 2.7        | <b>9.2</b> | 1.4                  | 1.9         | 2.2         | 2.2                | 2.4        | 2.5         |
| 3    | 0.5                  | <b>37.3</b> | 1.1         | 1.2                | <b>8.6</b> | 3.0        | 1.7                  | 4.4         | 5.3         | 2.4                | 2.8        | 3.0         |
| 4    | 0.3                  | 2.4         | 0.1         | 0.4                | 2.7        | 1.2        | 4.9                  | 17.6        | <b>55.0</b> | 3.2                | 4.9        | <b>9.4</b>  |

Table 4: Selection probability and number of patients treated at each dose-schedule combination assuming  $\delta \sim U(0, 6)$  and  $\gamma \sim U(0, 10)$

| Dose | Selection percentage |             |             | Number of patients |            |            | Selection percentage |             |             | Number of patients |            |             |
|------|----------------------|-------------|-------------|--------------------|------------|------------|----------------------|-------------|-------------|--------------------|------------|-------------|
|      | Schedule             |             |             | Schedule           |            |            | Schedule             |             |             | Schedule           |            |             |
|      | 1                    | 2           | 3           | 1                  | 2          | 3          | 1                    | 2           | 3           | 1                  | 2          | 3           |
|      | Scenario 1           |             |             |                    |            |            | Scenario 2           |             |             |                    |            |             |
| 1    | 0.3                  | 0.1         | 0.7         | 2.1                | 2.0        | 2.1        | 3.2                  | 2.9         | 4.5         | 2.6                | 2.5        | 2.8         |
| 2    | 4.1                  | 2.0         | 18.0        | 2.8                | 2.3        | 5.0        | 13.8                 | <b>51.5</b> | 14.7        | 5.4                | <b>9.0</b> | 5.9         |
| 3    | <b>49.1</b>          | 6.2         | 4.7         | <b>8.3</b>         | 3.0        | 4.6        | 0.8                  | 5.3         | 2.1         | 2.3                | 3.9        | 2.5         |
| 4    | 3.5                  | 8.3         | 0.9         | 2.9                | 2.9        | 1.8        | 0.1                  | 0.3         | 0.2         | 0.8                | 1.3        | 0.9         |
|      | Scenario 3           |             |             |                    |            |            | Scenario 4           |             |             |                    |            |             |
| 1    | <b>34.9</b>          | 7.7         | 0.4         | <b>6.3</b>         | 3.2        | 2.1        | 0.0                  | 1.1         | 2.3         | 2.1                | 2.2        | 2.5         |
| 2    | 21.8                 | 7.1         | 18.2        | 6.6                | 4.8        | 5.1        | 0.4                  | 0.7         | 4.5         | 2.1                | 2.2        | 2.8         |
| 3    | 0.4                  | 0.3         | 6.9         | 1.9                | 1.9        | 5.2        | 1.0                  | 2.2         | 13.9        | 2.2                | 2.6        | 4.4         |
| 4    | 0.0                  | 0.0         | 0.5         | 0.6                | 0.6        | 1.6        | 1.9                  | 10.0        | <b>61.6</b> | 2.5                | 3.9        | <b>10.5</b> |
|      | Scenario 5           |             |             |                    |            |            | Scenario 6           |             |             |                    |            |             |
| 1    | 0.3                  | 0.2         | 0.1         | 2.0                | 2.0        | 2.0        | 0.1                  | 1.1         | 3.2         | 2.0                | 2.2        | 3.0         |
| 2    | 0.7                  | 2.0         | 2.3         | 2.2                | 2.4        | 2.5        | 1.5                  | <b>44.1</b> | 0.8         | 2.4                | <b>9.2</b> | 2.2         |
| 3    | 1.8                  | 17.0        | <b>44.4</b> | 2.6                | 4.8        | <b>8.2</b> | <b>37.0</b>          | 6.8         | 0.1         | <b>7.8</b>         | 5.1        | 0.9         |
| 4    | <b>15.5</b>          | 9.0         | 5.9         | <b>3.8</b>         | 3.7        | 3.7        | 4.5                  | 0.5         | 0.1         | 3.1                | 1.7        | 0.4         |
|      | Scenario 7           |             |             |                    |            |            | Scenario 8           |             |             |                    |            |             |
| 1    | 1.3                  | 7.2         | <b>20.5</b> | 2.3                | 3.0        | <b>4.7</b> | 0.0                  | 0.1         | 0.0         | 2.0                | 2.0        | 2.0         |
| 2    | <b>28.8</b>          | 12.4        | 8.7         | <b>6.2</b>         | 5.2        | 4.6        | 0.7                  | <b>31.5</b> | 1.3         | 2.2                | <b>6.4</b> | 2.4         |
| 3    | 11.9                 | 3.4         | 1.9         | 5.1                | 3.0        | 2.2        | <b>27.3</b>          | 6.1         | <b>27.4</b> | <b>5.8</b>         | 4.5        | <b>6.0</b>  |
| 4    | 1.8                  | 0.2         | 0.0         | 1.7                | 1.0        | 0.8        | 2.2                  | 0.2         | 3.1         | 2.5                | 1.6        | 2.5         |
|      | Scenario 9           |             |             |                    |            |            | Scenario 10          |             |             |                    |            |             |
| 1    | 0.4                  | 0.2         | 0.0         | 2.1                | 2.1        | 2.0        | 1.2                  | 8.2         | 1.3         | 2.2                | 3.1        | 2.2         |
| 2    | 13.5                 | 6.3         | 0.0         | 4.4                | 3.0        | 2.0        | 15.1                 | 6.8         | <b>34.9</b> | 5.4                | 4.3        | <b>6.6</b>  |
| 3    | 10.4                 | <b>58.4</b> | 0.3         | 5.2                | <b>9.8</b> | 2.1        | 7.1                  | 0.7         | 18.9        | 3.9                | 2.1        | 5.9         |
| 4    | 0.2                  | 2.9         | 5.5         | 2.0                | 2.7        | 2.6        | 1.0                  | 0.0         | 3.8         | 1.3                | 0.7        | 2.1         |
|      | Scenario 11          |             |             |                    |            |            | Scenario 12          |             |             |                    |            |             |
| 1    | 6.5                  | 0.2         | 1.7         | 3.5                | 2.0        | 2.3        | 0.9                  | 1.8         | 1.7         | 2.2                | 2.4        | 2.3         |
| 2    | 2.1                  | 2.7         | <b>41.8</b> | 3.0                | 2.6        | <b>8.9</b> | 1.1                  | 2.0         | 1.9         | 2.2                | 2.3        | 2.3         |
| 3    | 0.3                  | <b>39.4</b> | 1.4         | 1.2                | <b>8.8</b> | 3.3        | 0.8                  | 4.3         | 3.7         | 2.3                | 2.8        | 2.9         |
| 4    | 0.0                  | 1.8         | 0.0         | 0.4                | 2.6        | 1.2        | 4.4                  | 17.5        | <b>59.0</b> | 3.0                | 5.0        | <b>10.1</b> |

Table 5: Selection probability and number of patients treated at each dose-schedule combination assuming  $\delta \sim U(0, 8)$  and  $\gamma \sim U(0, 10)$

| Dose | Selection percentage |             |             | Number of patients |             |            | Selection percentage |             |             | Number of patients |            |             |
|------|----------------------|-------------|-------------|--------------------|-------------|------------|----------------------|-------------|-------------|--------------------|------------|-------------|
|      | Schedule             |             |             | Schedule           |             |            | Schedule             |             |             | Schedule           |            |             |
|      | 1                    | 2           | 3           | 1                  | 2           | 3          | 1                    | 2           | 3           | 1                  | 2          | 3           |
|      | Scenario 1           |             |             |                    |             |            | Scenario 2           |             |             |                    |            |             |
| 1    | 0.3                  | 0.2         | 0.4         | 2.1                | 2.0         | 2.1        | 3.2                  | 3.0         | 4.9         | 2.5                | 2.4        | 2.8         |
| 2    | 2.8                  | 1.5         | 20.0        | 2.6                | 2.3         | 5.1        | 14.0                 | <b>53.0</b> | 14.3        | 5.5                | <b>9.5</b> | 5.5         |
| 3    | <b>50.2</b>          | 4.4         | 3.7         | <b>8.5</b>         | 2.9         | 4.4        | 1.1                  | 4.2         | 1.5         | 2.3                | 3.8        | 2.5         |
| 4    | 4.4                  | 8.7         | 0.5         | 3.0                | 3.0         | 1.7        | 0.0                  | 0.1         | 0.0         | 0.8                | 1.3        | 1.0         |
|      | Scenario 3           |             |             |                    |             |            | Scenario 4           |             |             |                    |            |             |
| 1    | <b>37.3</b>          | 8.3         | 0.5         | <b>6.6</b>         | 3.2         | 2.0        | 0.1                  | 0.9         | 2.4         | 2.1                | 2.3        | 2.4         |
| 2    | 22.6                 | 6.5         | 15.3        | 7.1                | 4.8         | 4.6        | 0.4                  | 1.2         | 5.5         | 2.1                | 2.2        | 3.0         |
| 3    | 0.8                  | 0.9         | 6.3         | 1.9                | 1.9         | 4.9        | 0.2                  | 2.2         | 10.5        | 2.1                | 2.4        | 4.0         |
| 4    | 0.0                  | 0.1         | 0.3         | 0.7                | 0.6         | 1.6        | 2.6                  | 11.1        | <b>61.8</b> | 2.6                | 4.1        | <b>10.5</b> |
|      | Scenario 5           |             |             |                    |             |            | Scenario 6           |             |             |                    |            |             |
| 1    | 0.2                  | 0.1         | 0.0         | 2.0                | 2.1         | 2.1        | 0.1                  | 0.3         | 3.4         | 2.0                | 2.1        | 3.0         |
| 2    | 0.3                  | 2.4         | 1.6         | 2.1                | 2.4         | 2.5        | 2.0                  | <b>40.6</b> | 1.4         | 2.4                | <b>8.6</b> | 2.3         |
| 3    | 2.6                  | 15.3        | <b>44.3</b> | 2.6                | 4.6         | <b>8.2</b> | <b>42.4</b>          | 5.1         | 0.1         | <b>8.8</b>         | 5.1        | 0.9         |
| 4    | <b>17.3</b>          | 7.5         | 7.4         | <b>3.9</b>         | 3.7         | 3.8        | 3.8                  | 0.5         | 0.1         | 2.9                | 1.7        | 0.3         |
|      | Scenario 7           |             |             |                    |             |            | Scenario 8           |             |             |                    |            |             |
| 1    | 1.6                  | 7.9         | <b>19.4</b> | 2.4                | 3.0         | <b>4.3</b> | 0.0                  | 0.3         | 0.0         | 2.0                | 2.1        | 2.0         |
| 2    | <b>32.0</b>          | 11.0        | 8.6         | <b>6.3</b>         | 5.1         | 4.8        | 0.3                  | <b>30.2</b> | 1.2         | 2.2                | <b>6.1</b> | 2.4         |
| 3    | 9.5                  | 4.1         | 2.0         | 5.0                | 3.2         | 2.2        | <b>27.5</b>          | 5.9         | <b>28.9</b> | <b>5.9</b>         | 4.4        | <b>6.3</b>  |
| 4    | 1.8                  | 0.4         | 0.0         | 1.7                | 1.1         | 0.8        | 3.1                  | 0.2         | 2.4         | 2.5                | 1.6        | 2.5         |
|      | Scenario 9           |             |             |                    |             |            | Scenario 10          |             |             |                    |            |             |
| 1    | 0.2                  | 0.5         | 0.0         | 2.0                | 2.1         | 2.0        | 0.8                  | 9.8         | 1.4         | 2.2                | 3.4        | 2.3         |
| 2    | 13.2                 | 6.6         | 0.2         | 4.4                | 3.0         | 2.0        | 16.2                 | 6.4         | <b>33.9</b> | 5.3                | 4.2        | <b>6.6</b>  |
| 3    | 7.3                  | <b>61.2</b> | 0.4         | 4.8                | <b>10.1</b> | 2.1        | 6.1                  | 0.7         | 17.1        | 4.0                | 2.0        | 5.6         |
| 4    | 0.4                  | 2.1         | 4.9         | 1.9                | 2.7         | 2.6        | 1.0                  | 0.2         | 5.4         | 1.4                | 0.7        | 2.2         |
|      | Scenario 11          |             |             |                    |             |            | Scenario 12          |             |             |                    |            |             |
| 1    | 5.9                  | 0.2         | 1.8         | 3.5                | 2.0         | 2.4        | 0.6                  | 1.4         | 2.0         | 2.2                | 2.4        | 2.3         |
| 2    | 2.0                  | 2.4         | <b>42.3</b> | 2.8                | 2.6         | <b>9.2</b> | 1.1                  | 1.6         | 1.8         | 2.2                | 2.3        | 2.4         |
| 3    | 0.4                  | <b>39.1</b> | 1.4         | 1.2                | <b>8.6</b>  | 3.1        | 1.7                  | 4.0         | 4.9         | 2.4                | 2.8        | 3.0         |
| 4    | 0.0                  | 1.9         | 0.4         | 0.4                | 2.6         | 1.2        | 4.5                  | 17.9        | <b>56.6</b> | 3.1                | 4.9        | <b>9.9</b>  |

Table 6: Selection probability and number of patients treated at each dose-schedule combination assuming  $\sigma^2 = 1$

| Dose | Selection percentage |             |             | Number of patients |            |            | Selection percentage |             |             | Number of patients |            |             |
|------|----------------------|-------------|-------------|--------------------|------------|------------|----------------------|-------------|-------------|--------------------|------------|-------------|
|      | Schedule             |             |             | Schedule           |            |            | Schedule             |             |             | Schedule           |            |             |
|      | 1                    | 2           | 3           | 1                  | 2          | 3          | 1                    | 2           | 3           | 1                  | 2          | 3           |
|      | Scenario 1           |             |             |                    |            |            | Scenario 2           |             |             |                    |            |             |
| 1    | 0.7                  | 0.8         | 1.2         | 2.1                | 2.1        | 2.2        | 5.0                  | 3.3         | 5.7         | 2.8                | 2.5        | 2.8         |
| 2    | 4.7                  | 2.4         | 19.4        | 2.8                | 2.5        | 5.0        | 12.5                 | <b>49.8</b> | 14.4        | 5.3                | <b>9.2</b> | 5.5         |
| 3    | <b>46.4</b>          | 5.0         | 2.0         | <b>8.2</b>         | 3.0        | 4.0        | 1.2                  | 5.8         | 1.5         | 2.3                | 3.9        | 2.4         |
| 4    | 3.5                  | 9.3         | 1.4         | 2.9                | 3.2        | 1.7        | 0.1                  | 0.2         | 0.1         | 0.9                | 1.4        | 0.9         |
|      | Scenario 3           |             |             |                    |            |            | Scenario 4           |             |             |                    |            |             |
| 1    | <b>40.4</b>          | 8.3         | 1.2         | <b>7.0</b>         | 3.1        | 2.2        | 0.5                  | 0.7         | 3.9         | 2.1                | 2.2        | 2.7         |
| 2    | 20.3                 | 7.8         | 12.5        | 6.9                | 4.9        | 4.0        | 0.5                  | 1.1         | 5.9         | 2.2                | 2.3        | 3.1         |
| 3    | 0.6                  | 0.6         | 6.8         | 2.0                | 1.9        | 4.7        | 0.6                  | 3.3         | 12.5        | 2.2                | 2.6        | 4.3         |
| 4    | 0.1                  | 0.3         | 0.4         | 0.7                | 0.6        | 1.7        | 2.6                  | 10.4        | <b>58.0</b> | 2.5                | 3.8        | <b>10.0</b> |
|      | Scenario 5           |             |             |                    |            |            | Scenario 6           |             |             |                    |            |             |
| 1    | 0.6                  | 0.5         | 0.6         | 2.1                | 2.1        | 2.1        | 0.3                  | 0.5         | 2.6         | 2.0                | 2.2        | 3.1         |
| 2    | 0.4                  | 3.5         | 2.8         | 2.1                | 2.7        | 2.8        | 1.5                  | <b>39.3</b> | 1.8         | 2.4                | <b>8.2</b> | 2.3         |
| 3    | 3.1                  | 13.9        | <b>40.9</b> | 2.7                | 4.3        | <b>7.7</b> | <b>42.7</b>          | 5.6         | 0.5         | <b>8.9</b>         | 4.8        | 1.0         |
| 4    | <b>18.9</b>          | 6.9         | 7.1         | <b>4.3</b>         | 3.6        | 3.5        | 3.8                  | 1.1         | 0.1         | 3.0                | 1.7        | 0.3         |
|      | Scenario 7           |             |             |                    |            |            | Scenario 8           |             |             |                    |            |             |
| 1    | 2.5                  | 8.3         | <b>22.3</b> | 2.3                | 3.2        | <b>5.1</b> | 0.0                  | 0.3         | 0.6         | 2.0                | 2.1        | 2.1         |
| 2    | <b>27.1</b>          | 9.3         | 8.2         | <b>6.0</b>         | 4.8        | 4.4        | 1.0                  | <b>30.8</b> | 2.1         | 2.3                | <b>6.3</b> | 2.5         |
| 3    | 9.8                  | 5.8         | 2.9         | 4.8                | 3.0        | 2.7        | <b>24.0</b>          | 6.4         | <b>27.5</b> | <b>5.4</b>         | 4.4        | <b>5.8</b>  |
| 4    | 2.0                  | 0.7         | 0.2         | 1.8                | 1.1        | 0.9        | 3.2                  | 1.1         | 3.0         | 2.7                | 1.7        | 2.7         |
|      | Scenario 9           |             |             |                    |            |            | Scenario 10          |             |             |                    |            |             |
| 1    | 1.7                  | 1.1         | 0.1         | 2.2                | 2.1        | 2.0        | 0.9                  | 8.9         | 1.8         | 2.2                | 3.3        | 2.3         |
| 2    | 14.8                 | 5.7         | 0.3         | 4.3                | 2.9        | 2.0        | 15.2                 | 4.5         | <b>34.2</b> | 5.2                | 4.5        | <b>6.6</b>  |
| 3    | 7.7                  | <b>55.0</b> | 1.5         | 4.9                | <b>9.4</b> | 2.3        | 7.9                  | 1.1         | 18.8        | 3.9                | 2.2        | 5.4         |
| 4    | 1.7                  | 2.8         | 5.0         | 2.0                | 2.8        | 2.9        | 0.7                  | 0.2         | 4.8         | 1.3                | 0.8        | 2.3         |
|      | Scenario 11          |             |             |                    |            |            | Scenario 12          |             |             |                    |            |             |
| 1    | 6.2                  | 0.2         | 2.2         | 3.6                | 2.1        | 2.4        | 1.0                  | 2.7         | 2.3         | 2.2                | 2.5        | 2.6         |
| 2    | 2.5                  | 3.1         | <b>40.8</b> | 2.9                | 2.5        | <b>9.0</b> | 1.4                  | 1.8         | 2.5         | 2.3                | 2.4        | 2.5         |
| 3    | 0.8                  | <b>39.8</b> | 0.8         | 1.2                | <b>8.8</b> | 3.0        | 1.9                  | 5.3         | 5.0         | 2.5                | 3.0        | 3.2         |
| 4    | 0.1                  | 1.3         | 0.2         | 0.4                | 2.6        | 1.2        | 4.5                  | 16.3        | <b>53.3</b> | 3.0                | 4.5        | <b>9.2</b>  |

Table 7: Selection probability and number of patients treated at each dose-schedule combination assuming  $\sigma^2 = 0.2$

| Dose | Selection percentage |             |             | Number of patients |            |            | Selection percentage |             |             | Number of patients |            |             |
|------|----------------------|-------------|-------------|--------------------|------------|------------|----------------------|-------------|-------------|--------------------|------------|-------------|
|      | Schedule             |             |             | Schedule           |            |            | Schedule             |             |             | Schedule           |            |             |
|      | 1                    | 2           | 3           | 1                  | 2          | 3          | 1                    | 2           | 3           | 1                  | 2          | 3           |
|      | Scenario 1           |             |             |                    |            |            | Scenario 2           |             |             |                    |            |             |
| 1    | 0.2                  | 0.1         | 0.7         | 2.0                | 2.0        | 2.1        | 4.3                  | 3.4         | 3.4         | 2.7                | 2.6        | 2.5         |
| 2    | 4.2                  | 0.5         | 20.6        | 2.8                | 2.2        | 5.3        | 15.9                 | <b>50.3</b> | 14.8        | 6.0                | <b>9.2</b> | 5.7         |
| 3    | <b>49.4</b>          | 4.7         | 4.6         | <b>8.5</b>         | 2.9        | 4.6        | 0.9                  | 4.7         | 1.6         | 2.3                | 3.7        | 2.4         |
| 4    | 4.7                  | 8.2         | 0.2         | 2.8                | 2.9        | 1.8        | 0.0                  | 0.2         | 0.0         | 0.8                | 1.3        | 0.8         |
|      | Scenario 3           |             |             |                    |            |            | Scenario 4           |             |             |                    |            |             |
| 1    | <b>34.9</b>          | 7.8         | 0.1         | <b>6.0</b>         | 3.2        | 2.0        | 0.0                  | 0.3         | 0.8         | 2.0                | 2.0        | 2.2         |
| 2    | 20.2                 | 8.0         | 17.5        | 6.3                | 5.1        | 5.4        | 0.6                  | 0.4         | 2.2         | 2.1                | 2.1        | 2.5         |
| 3    | 0.6                  | 0.4         | 9.3         | 1.8                | 2.0        | 5.2        | 0.5                  | 1.9         | 10.1        | 2.1                | 2.3        | 4.0         |
| 4    | 0.0                  | 0.0         | 0.1         | 0.6                | 0.6        | 1.6        | 2.1                  | 10.9        | <b>69.6</b> | 2.6                | 4.1        | <b>11.8</b> |
|      | Scenario 5           |             |             |                    |            |            | Scenario 6           |             |             |                    |            |             |
| 1    | 0.0                  | 0.0         | 0.1         | 2.0                | 2.0        | 2.0        | 0.0                  | 0.4         | 3.0         | 2.0                | 2.2        | 2.9         |
| 2    | 0.0                  | 1.6         | 1.9         | 2.0                | 2.4        | 2.5        | 1.7                  | <b>42.6</b> | 1.2         | 2.4                | <b>8.8</b> | 2.3         |
| 3    | 2.7                  | 17.2        | <b>44.0</b> | 2.6                | 5.1        | <b>8.1</b> | <b>40.4</b>          | 6.6         | 0.0         | <b>8.7</b>         | 5.3        | 0.9         |
| 4    | <b>14.9</b>          | 9.1         | 7.7         | <b>3.8</b>         | 3.8        | 3.6        | 3.3                  | 0.3         | 0.0         | 2.6                | 1.7        | 0.3         |
|      | Scenario 7           |             |             |                    |            |            | Scenario 8           |             |             |                    |            |             |
| 1    | 1.6                  | 5.4         | <b>17.2</b> | 2.3                | 2.9        | <b>4.0</b> | 0.0                  | 0.4         | 0.0         | 2.0                | 2.1        | 2.0         |
| 2    | <b>28.7</b>          | 15.1        | 10.5        | <b>6.3</b>         | 5.6        | 4.8        | 0.7                  | <b>31.4</b> | 0.4         | 2.2                | <b>6.4</b> | 2.3         |
| 3    | 12.7                 | 3.8         | 2.0         | 5.1                | 3.2        | 2.3        | <b>25.2</b>          | 8.0         | <b>29.2</b> | <b>5.6</b>         | 4.7        | <b>6.2</b>  |
| 4    | 1.7                  | 0.1         | 0.0         | 1.6                | 1.0        | 0.8        | 2.1                  | 0.0         | 2.4         | 2.4                | 1.7        | 2.4         |
|      | Scenario 9           |             |             |                    |            |            | Scenario 10          |             |             |                    |            |             |
| 1    | 0.1                  | 0.2         | 0.0         | 2.0                | 2.0        | 2.0        | 1.2                  | 8.5         | 1.4         | 2.2                | 3.0        | 2.2         |
| 2    | 13.2                 | 6.8         | 0.0         | 4.4                | 3.0        | 2.0        | 15.9                 | 8.4         | <b>32.2</b> | 5.6                | 4.5        | <b>6.4</b>  |
| 3    | 11.8                 | <b>57.6</b> | 0.3         | 5.5                | <b>9.2</b> | 2.1        | 6.8                  | 0.5         | 20.6        | 3.8                | 2.0        | 6.0         |
| 4    | 0.5                  | 3.6         | 4.0         | 2.0                | 2.8        | 2.7        | 0.2                  | 0.0         | 2.7         | 1.3                | 0.7        | 2.0         |
|      | Scenario 11          |             |             |                    |            |            | Scenario 12          |             |             |                    |            |             |
| 1    | 3.9                  | 0.1         | 2.4         | 3.2                | 2.0        | 2.4        | 0.4                  | 1.2         | 0.6         | 2.1                | 2.2        | 2.2         |
| 2    | 2.1                  | 2.7         | <b>43.7</b> | 2.7                | 2.6        | <b>9.5</b> | 0.5                  | 1.5         | 0.8         | 2.2                | 2.3        | 2.2         |
| 3    | 0.5                  | <b>40.0</b> | 1.0         | 1.1                | <b>9.0</b> | 3.2        | 1.4                  | 2.5         | 2.0         | 2.3                | 2.6        | 2.4         |
| 4    | 0.1                  | 1.8         | 0.1         | 0.3                | 2.4        | 1.2        | 5.6                  | 20.9        | <b>60.4</b> | 3.3                | 5.5        | <b>10.6</b> |
